# Supplementary material
Source: PubMed Central journal article supplement (PMC4356758)
Supplement: AAC.05114-14_zac004153851so1.pdf [file AAC.05114-14_zac004153851so1.pdf]

## SUPPLEMENTAL MATERIAL

**upstream (200 bp)**

**linker with *Bgl*II and *Xho*I underlined, respectively**

**downstream (200 bp)**

**TTCGCGATGCTCAACCGCGAGCACGGCCGCACCGTGGTGGCGGTGCTGCACGATCT  
CAACCAGGCCTGCCGCTACGCCGACGAGTTGATCGTCATGAAGGCGGGCCGCATCG  
TGGCCAGGGCGATCCCGACGTCGTGATGTCGGCCGATCTGGTGC GCGACGTCTAC  
GGGCTGGAATGCCAGATCATCGACGACCCGCAAGATCTgtcctaCTCGAGTGGTAAGCC  
TTACCTTTGATAGCATGCCGGTTGGCTTACGAGACGTCCAGTGCTCCGCACGGTAGT  
CGACAGCCAGGGGGAAGACCACCACGGCCCGCGTTGCGGTATTACGGTGGCCGAAA  
ATCTCGGGGGAAGGAAACGTTTGTCCACCAATCCTTTTGACGACACCGACGGCCGC  
TTCGTGGTCCTGGTCAACGACG**

FIGURE S1: *fxbA* flanking sequences.
